# Supplementary material for: Pharmacokinetics, Tissue Distribution and Excretion of Isoalantolactone and Alantolactone in Rats after Oral Administration of Radix Inulae Extract
Source: PubMed Central journal article supplement (PMC6272429; doi:10.3390/molecules20057719), 2015-04-28
Supplement: molecules-20-07719-s001.pdf [file molecules-20-07719-s001.pdf]

# Supplementary

**Table S1.** Precision, accuracy, extraction recovery and matrix effect for the isoalantolactone and alantolactone in rat plasma, liver, bile, urine and feces ( $n = 18$ , 6 replicates per day for 3 days).

| Sample matrix         | Concentration (ng/mL) | RSD (%)   |           | RE (%)    |              | Extraction Recovery (%) | Mean Matrix Effect (%) |
|-----------------------|-----------------------|-----------|-----------|-----------|--------------|-------------------------|------------------------|
|                       |                       | Intra-Day | Inter-Day | Intra-Day | Inter-Day    |                         |                        |
| Plasma                | Isoalantolactone      |           |           |           |              |                         |                        |
|                       | 2                     | 3.87      | 5.98      | -7.11     | -8.50        |                         |                        |
|                       | 5                     | 2.84      | 3.15      | -8.17     | -8.12        | 87.11 ± 6.50            | 103.59 ± 5.90          |
|                       | 25                    | 2.96      | 3.17      | -6.20     | 5.37         | 89.13 ± 3.45            | 101.24 ± 4.59          |
|                       | 80                    | 2.88      | 4.51      | -5.94     | 7.48         | 85.30 ± 6.61            | 99.32 ± 7.12           |
|                       | Alantolactone         |           |           |           |              |                         |                        |
|                       | 4                     | 4.40      | 5.80      | -9.29     | -9.58        |                         |                        |
|                       | 5                     | 3.13      | 5.35      | -10.11    | -9.29        | 83.40 ± 2.33            | 102.78 ± 3.63          |
|                       | 25                    | 4.20      | 5.83      | 2.14      | 6.13         | 84.35 ± 4.14            | 101.58 ± 5.47          |
|                       | 80                    | 3.09      | 7.11      | 5.39      | 3.66         | 81.76 ± 5.12            | 100.66 ± 4.35          |
| Liver                 | Isoalantolactone      |           |           |           |              |                         |                        |
|                       | 5                     | 5.39      | 8.20      | -5.79     | -11.92       | 84.20 ± 1.61            | 105.25 ± 7.09          |
|                       | 50                    | 6.11      | 9.14      | -9.14     | -8.46        | 85.21 ± 3.12            | 105.51 ± 6.12          |
|                       | 250                   | 5.83      | 8.69      | -9.78     | 9.53         | 87.30 ± 4.59            | 99.31 ± 1.08           |
|                       | Alantolactone         |           |           |           |              |                         |                        |
|                       | 5                     | 6.38      | 6.20      | 9.30      | 9.45         | 82.22 ± 3.56            | 104.02 ± 2.58          |
|                       | 50                    | 5.34      | 8.20      | -5.31     | -7.56        | 84.42 ± 3.29            | 102.78 ± 4.29          |
| 250                   | 5.68                  | 6.88      | -4.28     | -6.60     | 86.65 ± 5.47 | 96.58 ± 4.90            |                        |
| Bile                  | Isoalantolactone      |           |           |           |              |                         |                        |
|                       | 10 <sup>3</sup>       | 6.23      | 6.98      | -4.30     | -3.78        | 93.28 ± 5.89            | 102.66 ± 3.75          |
|                       | 10 <sup>4</sup>       | 5.78      | 7.97      | -3.34     | 5.13         | 94.20 ± 6.44            | 95.25 ± 3.31           |
|                       | 5 × 10 <sup>4</sup>   | 7.15      | 8.66      | 6.77      | 6.28         | 93.60 ± 6.60            | 105.51 ± 8.47          |
|                       | Alantolactone         |           |           |           |              |                         |                        |
|                       | 10 <sup>3</sup>       | 6.99      | 7.32      | -8.60     | -5.33        | 91.24 ± 5.11            | 104.31 ± 6.63          |
|                       | 10 <sup>4</sup>       | 6.53      | 8.34      | -7.71     | 4.21         | 92.75 ± 5.33            | 101.02 ± 6.35          |
| 5 × 10 <sup>4</sup>   | 6.31                  | 8.87      | 7.38      | 4.70      | 90.49 ± 5.54 | 100.30 ± 3.22           |                        |
| Urine                 | Isoalantolactone      |           |           |           |              |                         |                        |
|                       | 5                     | 4.28      | 8.13      | 2.39      | 13.20        | 94.99 ± 4.40            | 105.01 ± 4.48          |
|                       | 25                    | 3.55      | 7.01      | 8.64      | 4.46         | 88.96 ± 3.88            | 104.56 ± 4.55          |
|                       | 250                   | 7.34      | 8.24      | 4.51      | 7.57         | 80.57 ± 4.64            | 102.23 ± 4.28          |
|                       | Alantolactone         |           |           |           |              |                         |                        |
|                       | 5                     | 3.25      | 6.99      | -7.60     | -9.39        | 93.28 ± 3.97            | 104.81 ± 4.13          |
|                       | 25                    | 4.57      | 8.56      | 6.40      | 7.30         | 90.54 ± 5.34            | 102.24 ± 7.16          |
| 250                   | 8.11                  | 8.79      | 4.70      | 6.79      | 82.23 ± 6.75 | 100.81 ± 3.99           |                        |
| Feces                 | Isoalantolactone      |           |           |           |              |                         |                        |
|                       | 5 × 10 <sup>3</sup>   | 7.50      | 7.15      | 3.61      | 4.32         | 91.77 ± 2.62            | 102.74 ± 2.73          |
|                       | 2.5 × 10 <sup>4</sup> | 8.76      | 9.83      | 4.10      | 9.52         | 95.38 ± 2.95            | 101.79 ± 3.33          |
|                       | 2.5 × 10 <sup>5</sup> | 4.30      | 6.67      | 4.88      | 4.79         | 94.15 ± 2.69            | 104.54 ± 3.72          |
|                       | Alantolactone         |           |           |           |              |                         |                        |
|                       | 5 × 10 <sup>3</sup>   | 8.44      | 9.56      | 5.87      | 6.98         | 90.01 ± 2.66            | 102.82 ± 3.59          |
|                       | 2.5 × 10 <sup>4</sup> | 8.34      | 8.30      | 3.60      | 7.13         | 93.78 ± 2.43            | 101.28 ± 1.39          |
| 2.5 × 10 <sup>5</sup> | 6.10                  | 6.12      | 3.59      | 8.03      | 92.80 ± 2.57 | 103.46 ± 5.68           |                        |
